# Supplementary material for: Effects of Salinity Stress on Growth and Physiological Parameters and Related Gene Expression in Different Ecotypes of Sesuvium portulacastrum on Hainan Island
Source: MDPI journal article supplement (doi:10.3390/genes14071336), 2023-06-25
Supplement: s1 [file s1]

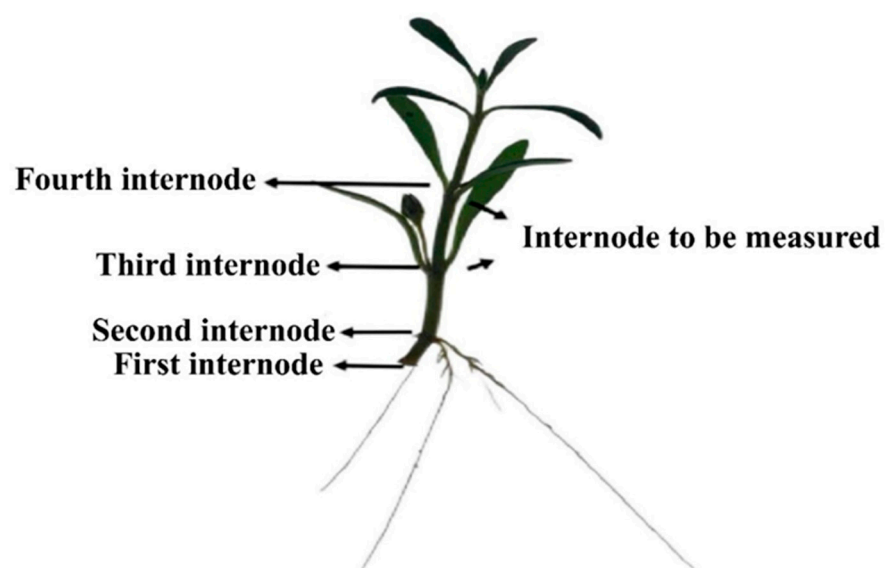

**Figure S1.** Measurement of internode length.

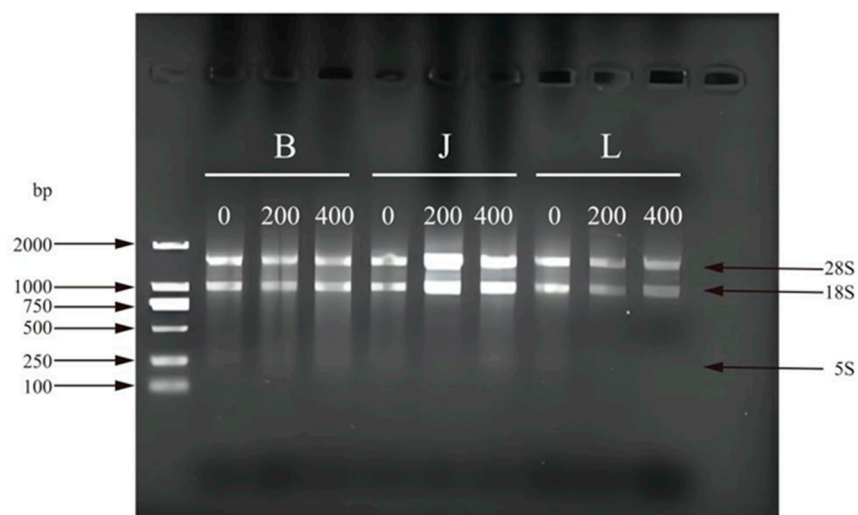

**Figure S2.** Electrophoresis of total RNA.

**Table S1.** Primers used for quantitative real-time PCR analysis.

| Primer name | Primer sequence (5'-3') | Base number (bp) |
|-------------|-------------------------|------------------|
| GAPDH-F     | TTGGCATCGTTGAGGGTCT     | 19               |
| GAPDH-R     | CAGTGGGAACACGGAAAGC     | 19               |
| SpP5CS1-F   | TGGAACTGAAGGCCGATCTC    | 20               |
| SpP5CS1-R   | ATGTGTGGATGAGCTTTGATCG  | 22               |
| SpLOX1-F    | CAGAGTACGAGGAGCTCACGA   | 21               |
| SpLOX1-R    | GATCTCGTCAGAGGAATGTCTCG | 23               |
| SpLOX5-F    | GTGTCTCCCTTCAGCTCATTAGT | 23               |
| SpLOX5-R    | CGTCTCTCCAGCAGTCAATGA   | 21               |
| SpCHL1a-F   | TGGAACTGCCCCACTGATTCG   | 20               |
| SpCHL1a-R   | TGTCCAAGAACCGGAATTGCT   | 21               |
| SpCHL1b-F   | ATGTTACCAATTTGGGCAACCAC | 23               |
| SpCHL1b-R   | AACTTCCCATGTGACGGTTC    | 20               |

**Table S2** Loads, characteristic of roots, and contribution rates of variables in principal components

| Variable                     | Principle component 1 | Principle component 2 |
|------------------------------|-----------------------|-----------------------|
| Relative water content       | -0.527                | 0.713                 |
| Chlorophyll content          | 0.785                 | 0.277                 |
| Malondialdehyde content      | 0.821                 | 0.185                 |
| Proline content              | 0.909                 | -0.302                |
| Soluble sugar content        | 0.052                 | 0.83                  |
| Plant height                 | 0.588                 | 0.404                 |
| Eigenvalue                   | 2.742                 | 1.564                 |
| Contribution rate            | 45.706                | 26.063                |
| Cumulative contribution rate | 45.706                | 71.769                |
